# Supplementary material for: Supramolecular hydrogen-bonding assembly of silanediols with bifunctional heterocycles
Source: Royal Society of Chemistry journal article supplement (doi:10.1039/c4cc00672k), 2014-01-01
Supplement: c4cc00672k1.pdf [file c4cc00672k1.pdf]

Supporting Information for:

**Supramolecular Hydrogen-bonding Assembly of Silanediols  
with Bifunctional Heterocycles**

Ngon T. Tran, Sean O. Wilson, and Annaliese K. Franz\*

*Department of Chemistry, One Shields Ave, University of California, Davis, CA 95616*

|             |                                                              |     |
|-------------|--------------------------------------------------------------|-----|
| <b>I.</b>   | <b>General Information</b>                                   | S2  |
| <b>II.</b>  | <b>Diffusion-ordered NMR Spectroscopy (DOSY) Experiments</b> | S2  |
| <b>III.</b> | <b>NMR Binding Studies</b>                                   | S19 |
| <b>IV.</b>  | <b>Crystallography Data</b>                                  | S20 |

## I. General Information

**Instruments and Analyses.** All nuclear magnetic resonance (NMR) spectra were obtained on Varian VNMRs 600 or Bruker Avance 500 at room temperature. Chemical shifts were reported in parts per million ( $\delta$  scale), and referenced according to the following standards:  $^1\text{H}$  signals in chloroform, benzene residual solvent ( $\delta$  7.16) for  $^1\text{H}$  signals in benzene.

**Materials and Purification.** Dichloromethane (DCM), diethyl ether ( $\text{Et}_2\text{O}$ ), and benzene were obtained from EMD Chemicals. Benzene ( $\text{C}_6\text{D}_6$ ) was acquired from Cambridge Isotope Laboratories. 7-azaindole was purchased from Acros Organics. Phenazine, 4,4'-bipyridine, 1,4-dimethoxybenzene, and tetramethylsilane (TMS) were obtained from Sigma Aldrich. 1-tetradecene (TDE) and cyclooctene (COE) were obtained from TCI Chemicals. All chemicals were used as purchased, without further purification.

Dimesitylsilanediol (**1**) was synthesized according to procedures previously reported in the literature and matches spectral data reported.<sup>1,2</sup> Spectral data for **1**:  $^1\text{H}$  NMR (600 MHz,  $\text{CDCl}_3$ )  $\delta$  6.72 (s, 4H), 3.41 (s, 2H), 2.30 (s, 12H), 2.20 (s, 6H).

## II. Diffusion-ordered NMR Spectroscopy (DOSY) Experiments

$^1\text{H}$  diffusion-ordered NMR spectroscopy experiments were prepared by adding the appropriate amount of silanediol and binding partner, indicated below, to a vial along with internal standards: tetramethylsilane (TMS), cyclooctene (COE), and 1-tetradecene (TDE). The material was dissolved in 1.0 mL of  $\text{C}_6\text{D}_6$  and transferred to an NMR tube. The spectra were acquired on a Bruker Avance 500 using a 2D stimulated echo experiment pulse sequence (stegp1s). Experimental parameters transmitter offset (o1p), sweep width (sw), and receiver gain (rg) were obtained from a  $^1\text{H}$  spectra prior to data acquisition. A linear gradient ramp from 5% to 95% strength with 25 data points (8 scans each) was used. Diffusion constants from the resulting spectra were processed using the T1/T2 relaxation function within the TopSpin 2.1 software after phase correction. Estimated formula weights of NMR-observed species were calculated by graphing  $\log(\text{formula weight})$  v  $\log(\text{diffusion constant})$  of the internal standards and fitting a straight line to these data points.<sup>3,4</sup> Using the experimental diffusion constant of  $\text{Mes}_2\text{Si}(\text{OH})_2$ , the formula weight of the observed species was calculated using the line of best fit equation.

---

<sup>1</sup> Tran, N. T.; Min, T.; Franz, A. K. *Chem. Eur. J.* **2011**, *17*, 9897-9900.

<sup>2</sup> Tran, N. T.; Wilson, S. O.; Franz, A. K. *Org. Lett.* **2012**, *14*, 186.

<sup>3</sup> Li, D.; Sun, C.; Williard, P. G. *J. Am. Chem. Soc.* **2008**, *130*, 11726-11736.

<sup>4</sup> Li, D.; Keresztes, I.; Hopson, R.; Williard, P. G. *Acc. Chem. Res.* **2009**, *42*, 270-280.

## Mes<sub>2</sub>Si(OH)<sub>2</sub> DOSY Self Association Studies

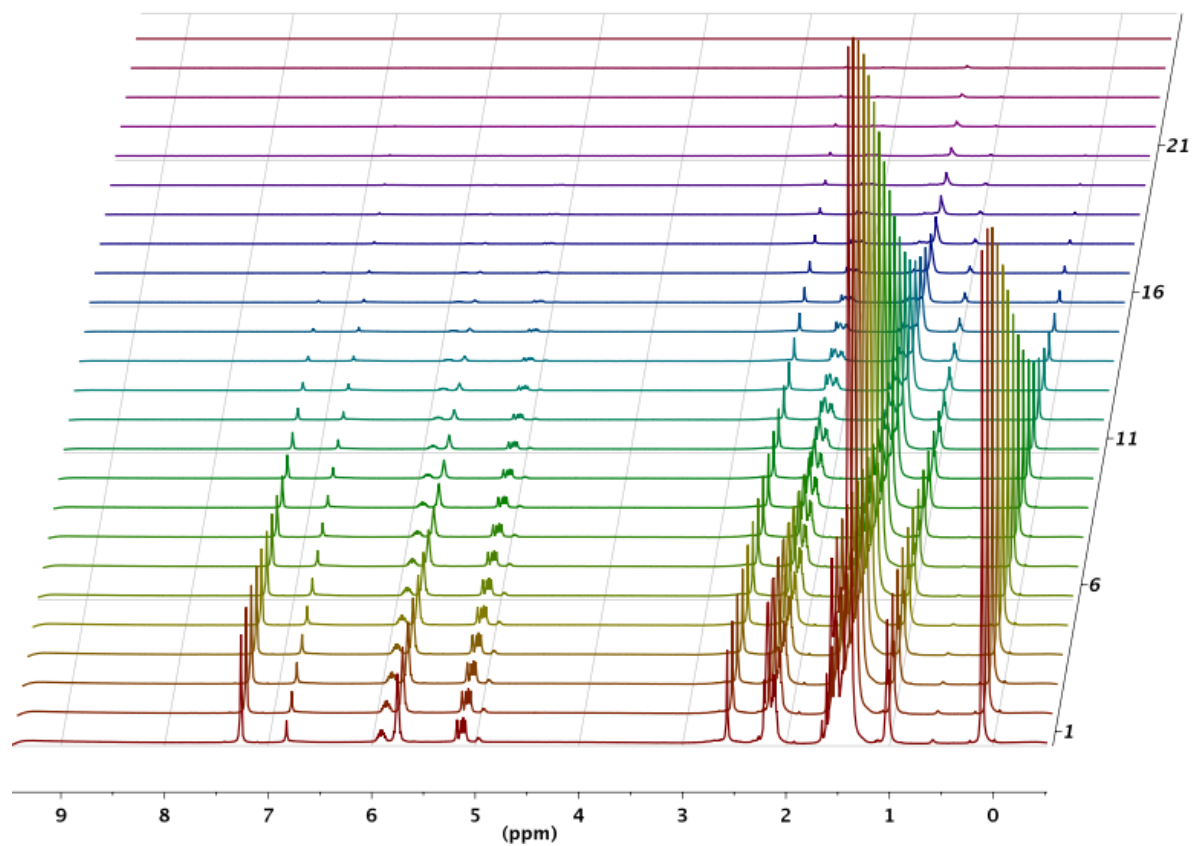

**Figure S1.** <sup>1</sup>H DOSY experiment with Mes<sub>2</sub>Si(OH)<sub>2</sub> (10 mM) in C<sub>6</sub>D<sub>6</sub> with internal standards (TMS, COE, TDE).

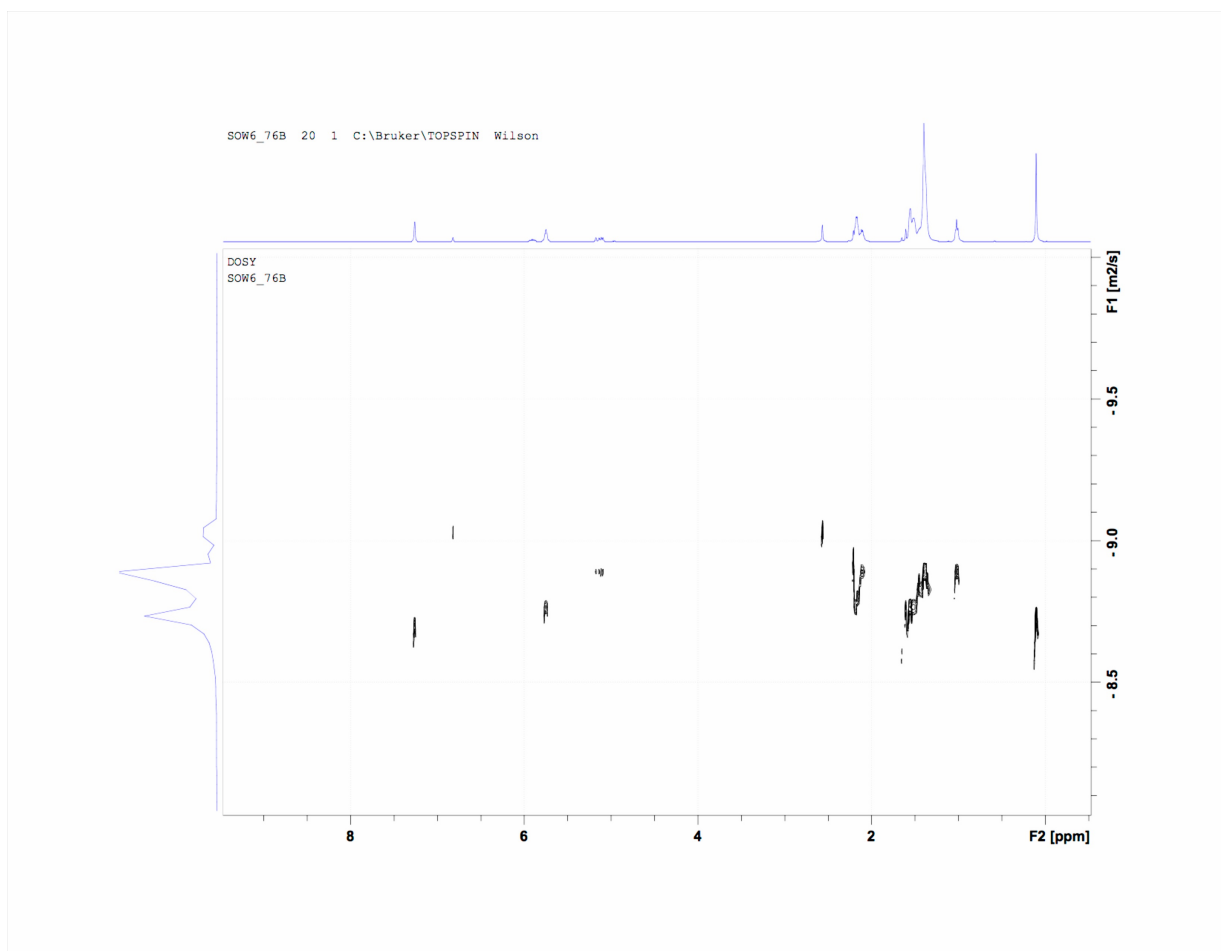

**Figure S2.**  $^1\text{H}$  DOSY spectrum of  $\text{Me}_2\text{Si}(\text{OH})_2$  (10 mM) in  $\text{C}_6\text{D}_6$  with internal standards.

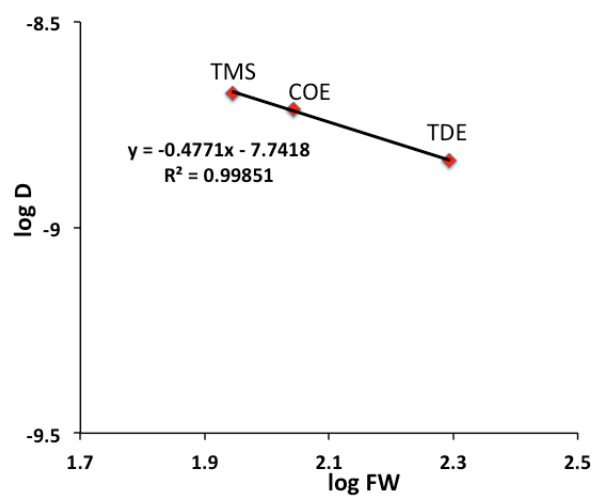

**Figure S3.** Standard curve for  $^1\text{H}$  DOSY experiment with  $\text{Me}_2\text{Si}(\text{OH})_2$  (10 mM) in  $\text{C}_6\text{D}_6$  with internal standards (TMS, COE, TDE).

**Scheme S1:** Proposed Equilibrium for Mes<sub>2</sub>Si(OH)<sub>2</sub> at 10mM

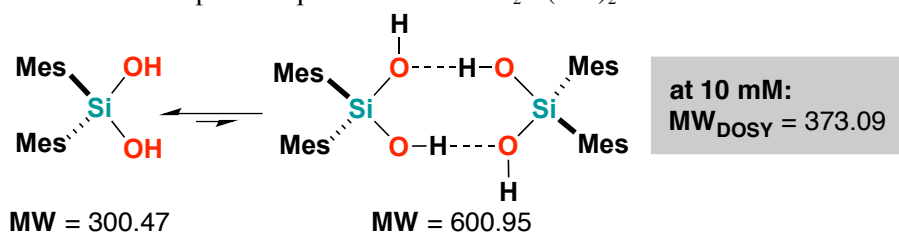

**Table S1.** Diffusion constants and estimated formula weight of species observed in <sup>1</sup>H NMR spectra with 10 mM of Mes<sub>2</sub>Si(OH)<sub>2</sub> in C<sub>6</sub>D<sub>6</sub> suggest self-association but primarily monomeric form.

| Molecule                             | D (m <sup>2</sup> /s) | log D  | FW (g/mol) | log FW |
|--------------------------------------|-----------------------|--------|------------|--------|
| COE                                  | 1.94E-09              | -8.712 | 110.20     | 2.042  |
| TDE                                  | 1.46E-09              | -8.837 | 196.37     | 2.293  |
| TMS                                  | 2.12E-09              | -8.673 | 88.22      | 1.946  |
| Mes <sub>2</sub> Si(OH) <sub>2</sub> | 1.07E-09              | -8.969 | 373.09     | 2.572  |

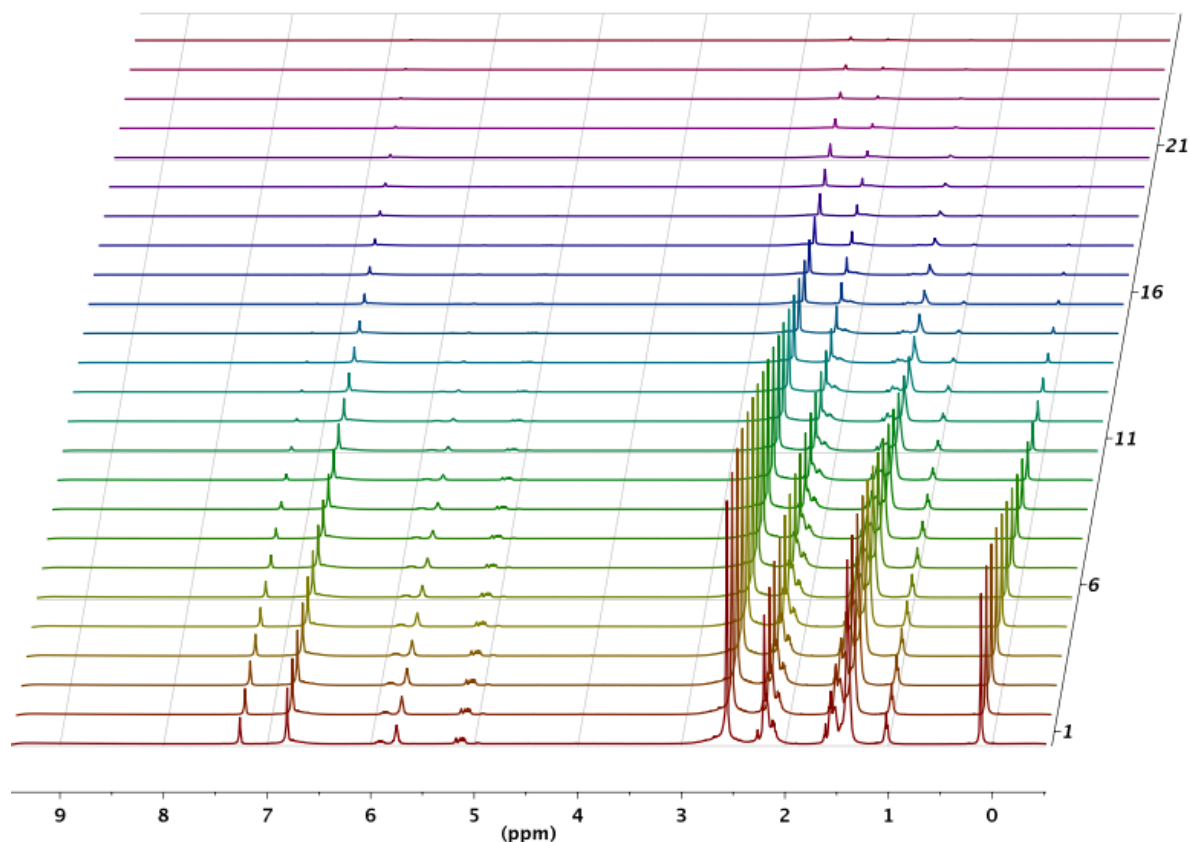

**Figure S4.** <sup>1</sup>H DOSY experiment with Mes<sub>2</sub>Si(OH)<sub>2</sub> (100 mM) in C<sub>6</sub>D<sub>6</sub> with internal standards (TMS, COE, TDE).

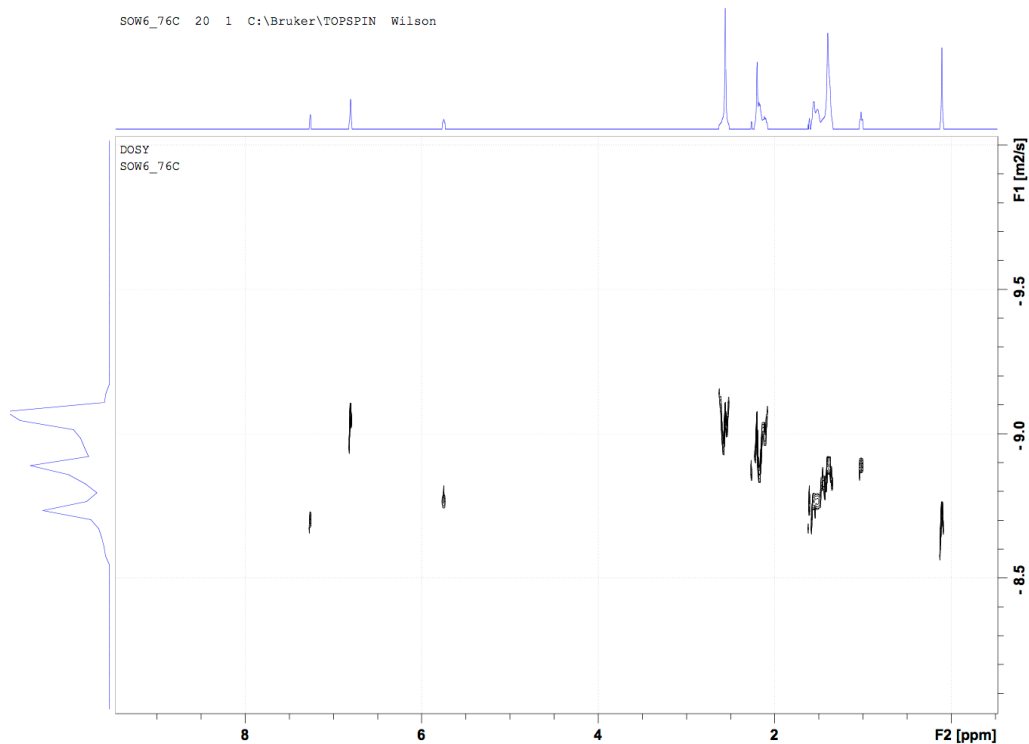

**Figure S5.**  $^1\text{H}$  DOSY spectrum of  $\text{Mes}_2\text{Si}(\text{OH})_2$  (100 mM) in  $\text{C}_6\text{D}_6$  with internal standards.

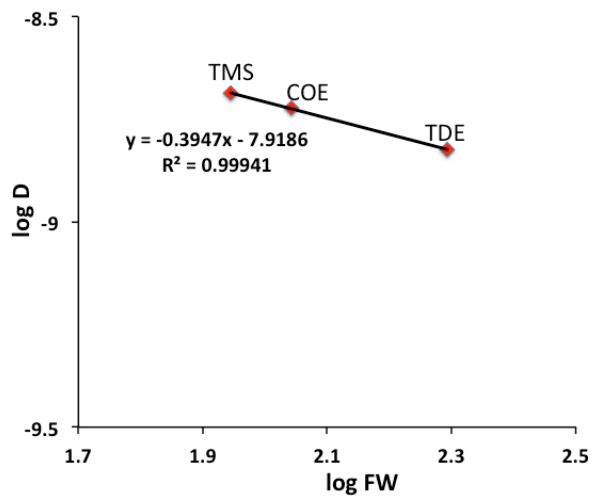

**Figure S6.** Standard curve for  $^1\text{H}$  DOSY experiment with  $\text{Mes}_2\text{Si}(\text{OH})_2$  (100 mM) in  $\text{C}_6\text{D}_6$  with internal standards (TMS, COE, TDE).

**Scheme S2:** Proposed Equilibrium for  $\text{Mes}_2\text{Si}(\text{OH})_2$  at 100mM

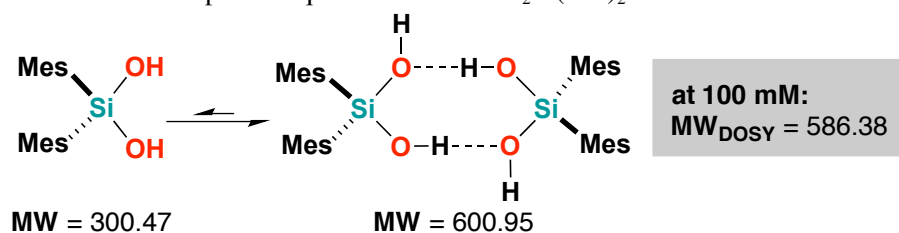

**Table S2.** Diffusion constants and estimated formula weight of  $\text{Mes}_2\text{Si}(\text{OH})_2$  species observed in  $^1\text{H}$  NMR spectra (100 mM  $\text{Mes}_2\text{Si}(\text{OH})_2$ ) correlate to a higher order hydrogen-bonded species in equilibrium.

| Molecule                             | D (m <sup>2</sup> /s) | log D  | FW (g/mol) | log FW |
|--------------------------------------|-----------------------|--------|------------|--------|
| COE                                  | 1.89E-09              | -8.723 | 110.20     | 2.042  |
| TDE                                  | 1.50E-09              | -8.824 | 196.37     | 2.293  |
| TMS                                  | 2.05E-09              | -8.688 | 88.22      | 1.946  |
| $\text{Mes}_2\text{Si}(\text{OH})_2$ | 9.75E-10              | -9.011 | 586.38     | 2.768  |

## Mes<sub>2</sub>Si(OH)<sub>2</sub> DOSY Studies with 7-azaindole

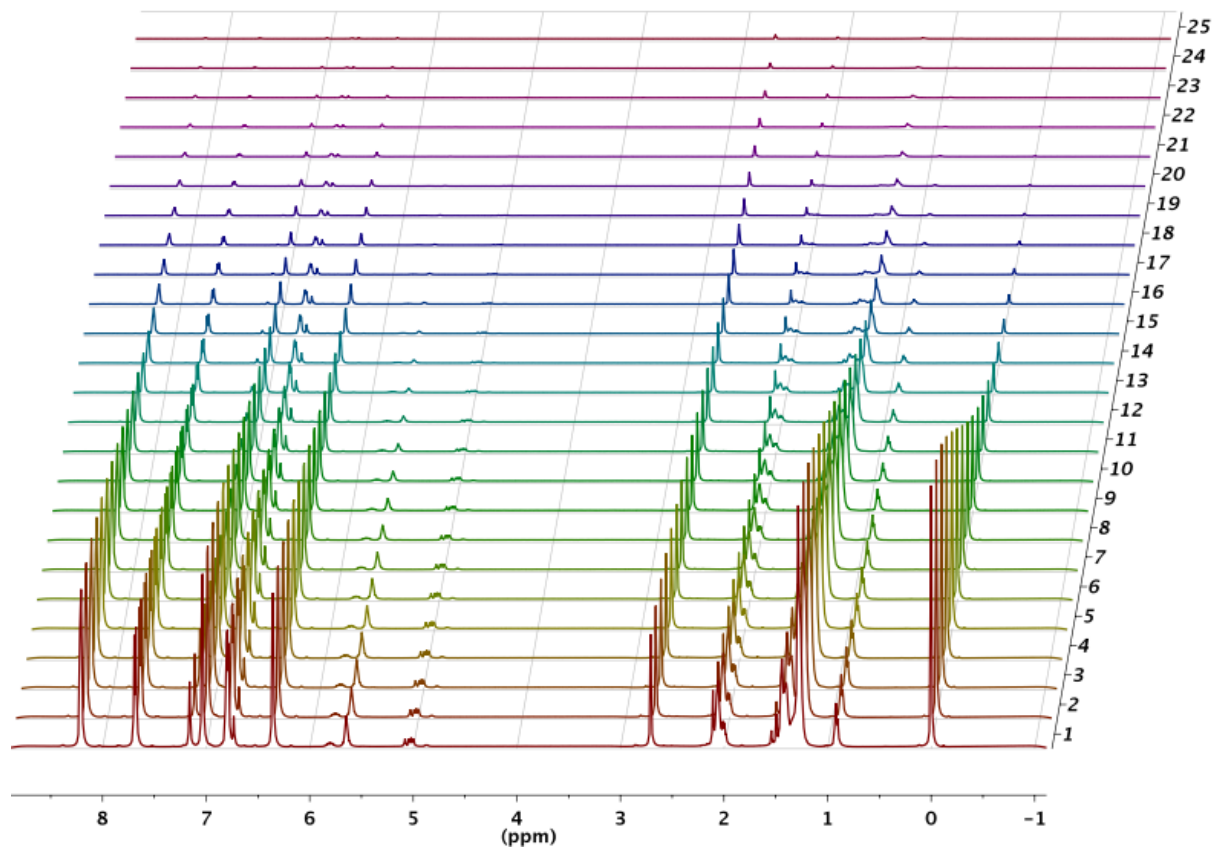

**Figure S7.** <sup>1</sup>H DOSY experiment with Mes<sub>2</sub>Si(OH)<sub>2</sub> (10 mM) and 7-azaindole (500 mM) in C<sub>6</sub>D<sub>6</sub> with internal standards (TMS, COE, TDE).



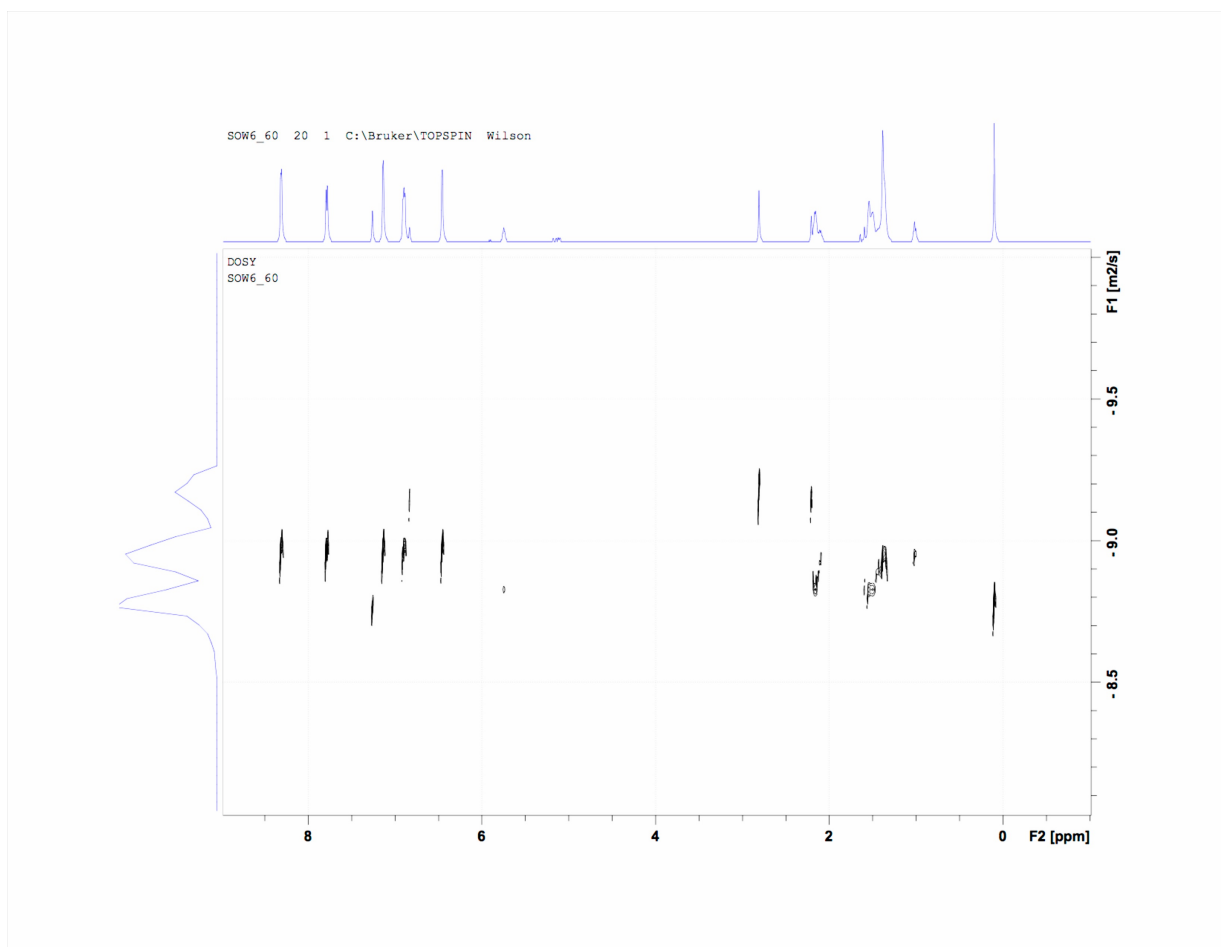

**Figure S8.**  $^1\text{H}$  DOSY spectrum of  $\text{Mes}_2\text{Si}(\text{OH})_2$  (10 mM) and 7-azaindole (500 mM) in  $\text{C}_6\text{D}_6$  with internal standards.

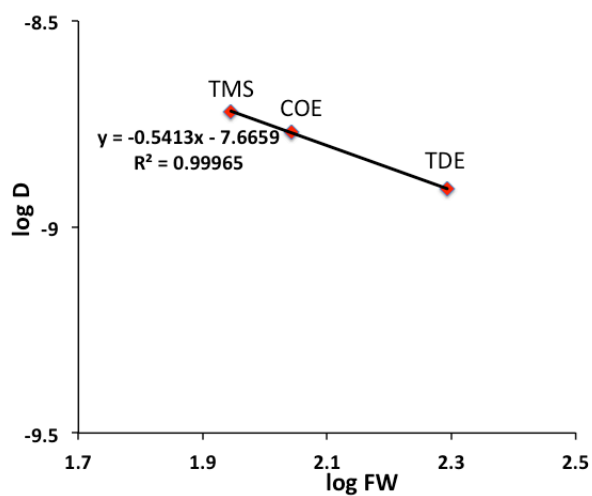

**Figure S9.** Standard curve for  $^1\text{H}$  DOSY experiment with  $\text{Mes}_2\text{Si}(\text{OH})_2$  (10 mM) and 7-azaindole (500 mM) in  $\text{C}_6\text{D}_6$  with internal standards (TMS, COE, TDE).

**Scheme S3:** Proposed Equilibrium for Mes<sub>2</sub>Si(OH)<sub>2</sub> at 10mM with 7-Azaindole

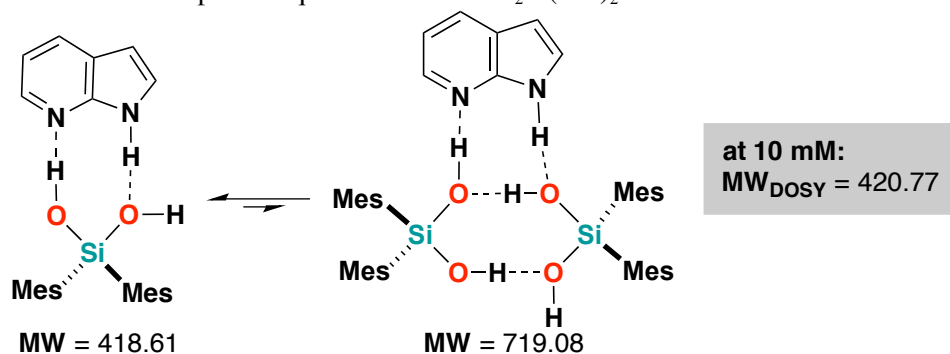

**Table S3.** Diffusion constants and estimated formula weight of species observed in <sup>1</sup>H NMR spectra with 10 mM of Mes<sub>2</sub>Si(OH)<sub>2</sub> and 50 equivalents of 7-azaindole match corresponding heterodimer.

| Molecule                             | D (m <sup>2</sup> /s) | log D  | FW (g/mol) | log FW |
|--------------------------------------|-----------------------|--------|------------|--------|
| COE                                  | 1.70E-09              | -8.769 | 110.20     | 2.042  |
| TDE                                  | 1.24E-09              | -8.908 | 196.37     | 2.293  |
| TMS                                  | 1.90E-09              | -8.720 | 88.22      | 1.946  |
| Mes <sub>2</sub> Si(OH) <sub>2</sub> | 8.20E-10              | -9.086 | 420.77     | 2.624  |

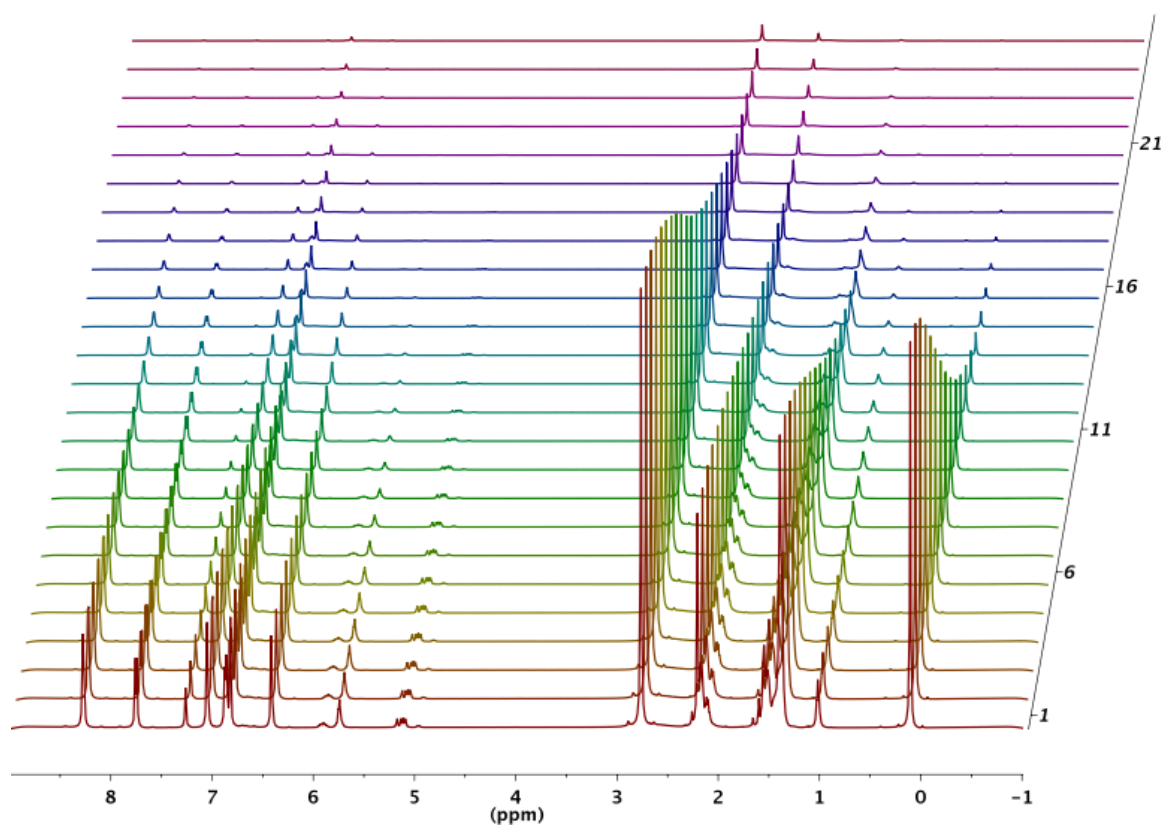

**Figure S10.** <sup>1</sup>H DOSY experiment with Mes<sub>2</sub>Si(OH)<sub>2</sub> (100 mM) and 7-azaindole (500 mM) in C<sub>6</sub>D<sub>6</sub> with internal standards (TMS, COE, TDE).

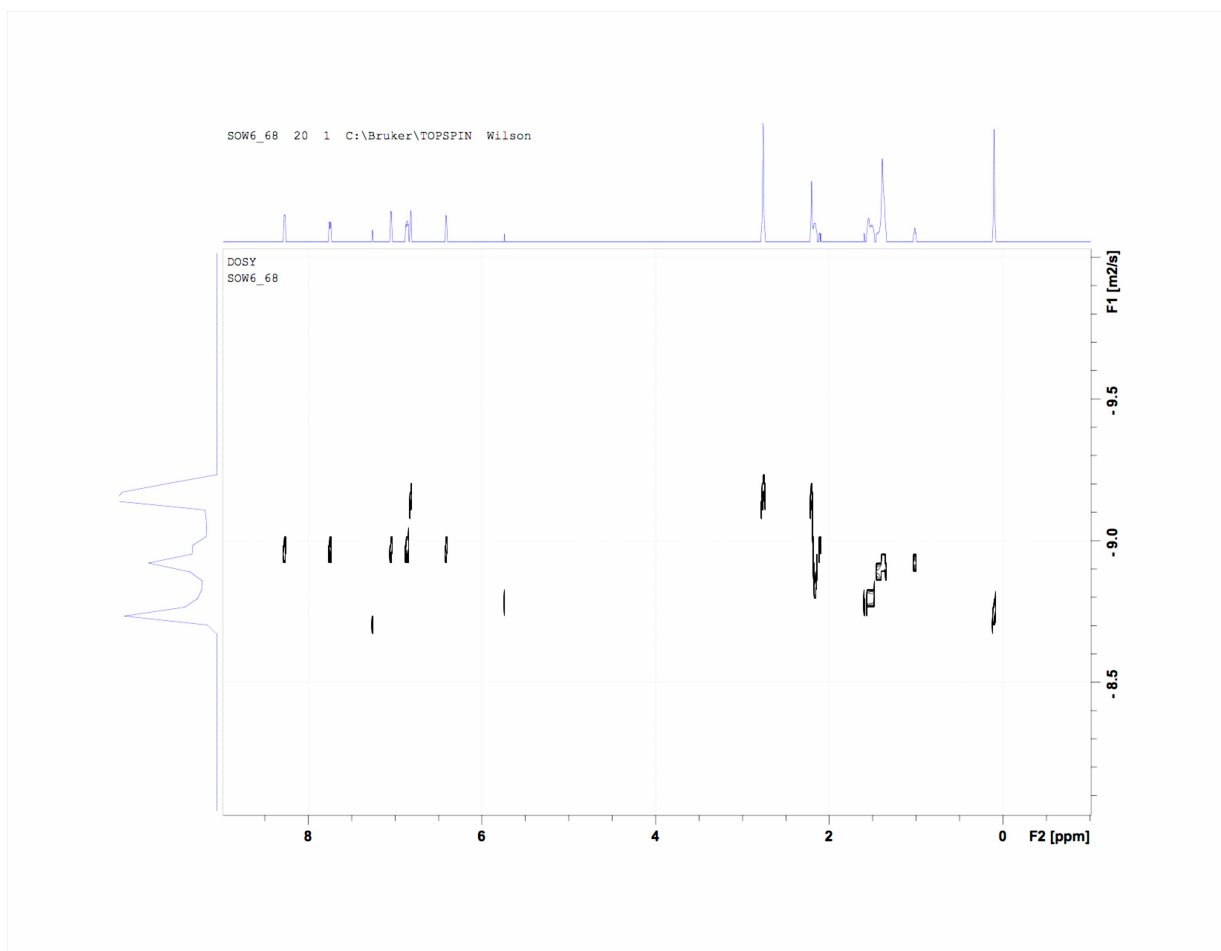

**Figure S11.**  $^1\text{H}$  DOSY spectrum of  $\text{Mes}_2\text{Si}(\text{OH})_2$  (100 mM) and 7-azaindole (500 mM) in  $\text{C}_6\text{D}_6$  with internal standards.

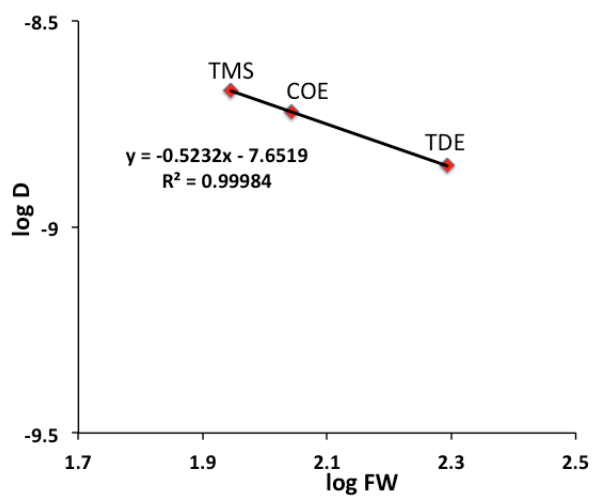

**Figure S12.** Standard curve for  $^1\text{H}$  DOSY experiment with  $\text{Mes}_2\text{Si}(\text{OH})_2$  (100 mM) and 7-azaindole (500 mM) in  $\text{C}_6\text{D}_6$  with internal standards (TMS, COE, TDE).

**Scheme S4:** Proposed Equilibrium for  $\text{Mes}_2\text{Si}(\text{OH})_2$  at 100mM with 7-Azaindole

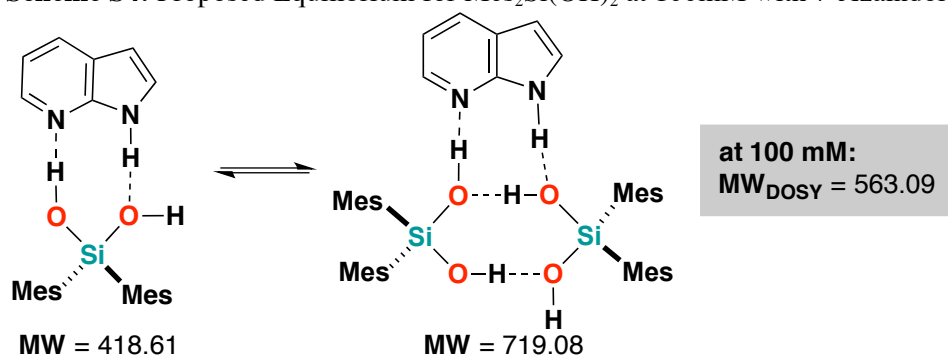

**Table S4.** Diffusion constants and estimated formula weight of  $\text{Mes}_2\text{Si}(\text{OH})_2$  species observed in  $^1\text{H}$  NMR spectra (100 mM  $\text{Mes}_2\text{Si}(\text{OH})_2$  and 500 mM 7-azaindole) correlate to a higher order hydrogen-bonded species in equilibrium.

| Molecule                             | D ( $\text{m}^2/\text{s}$ ) | log D  | FW (g/mol) | log FW |
|--------------------------------------|-----------------------------|--------|------------|--------|
| COE                                  | 1.90E-09                    | -8.722 | 110.20     | 2.042  |
| TDE                                  | 1.41E-09                    | -8.851 | 196.37     | 2.293  |
| TMS                                  | 2.14E-09                    | -8.669 | 88.22      | 1.946  |
| $\text{Mes}_2\text{Si}(\text{OH})_2$ | 8.11E-10                    | -9.091 | 563.09     | 2.751  |

## Mes<sub>2</sub>Si(OH)<sub>2</sub> DOSY Studies with 4,4'-bipyridine

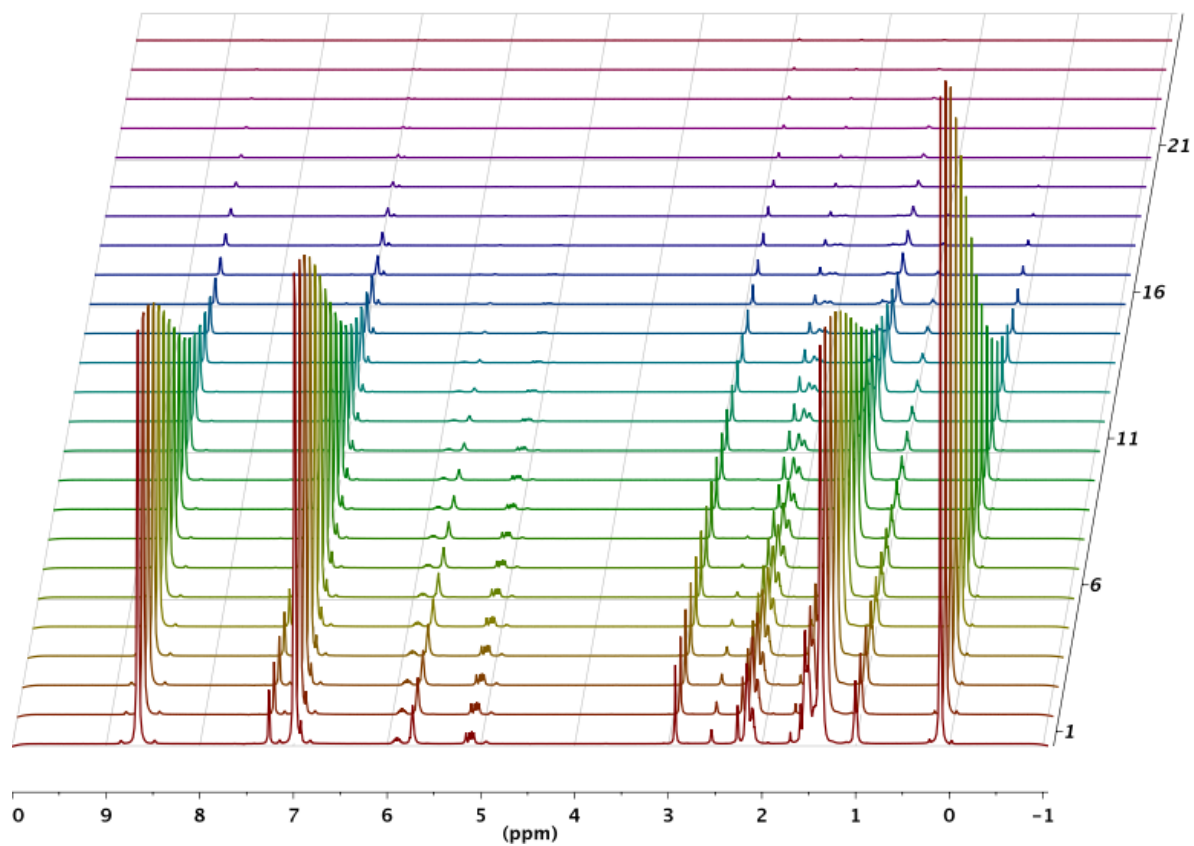

**Figure S13.** <sup>1</sup>H DOSY experiment with Mes<sub>2</sub>Si(OH)<sub>2</sub> (10 mM) and 4,4'-bipyridine (500 mM) in C<sub>6</sub>D<sub>6</sub> with internal standards (TMS, COE, TDE).

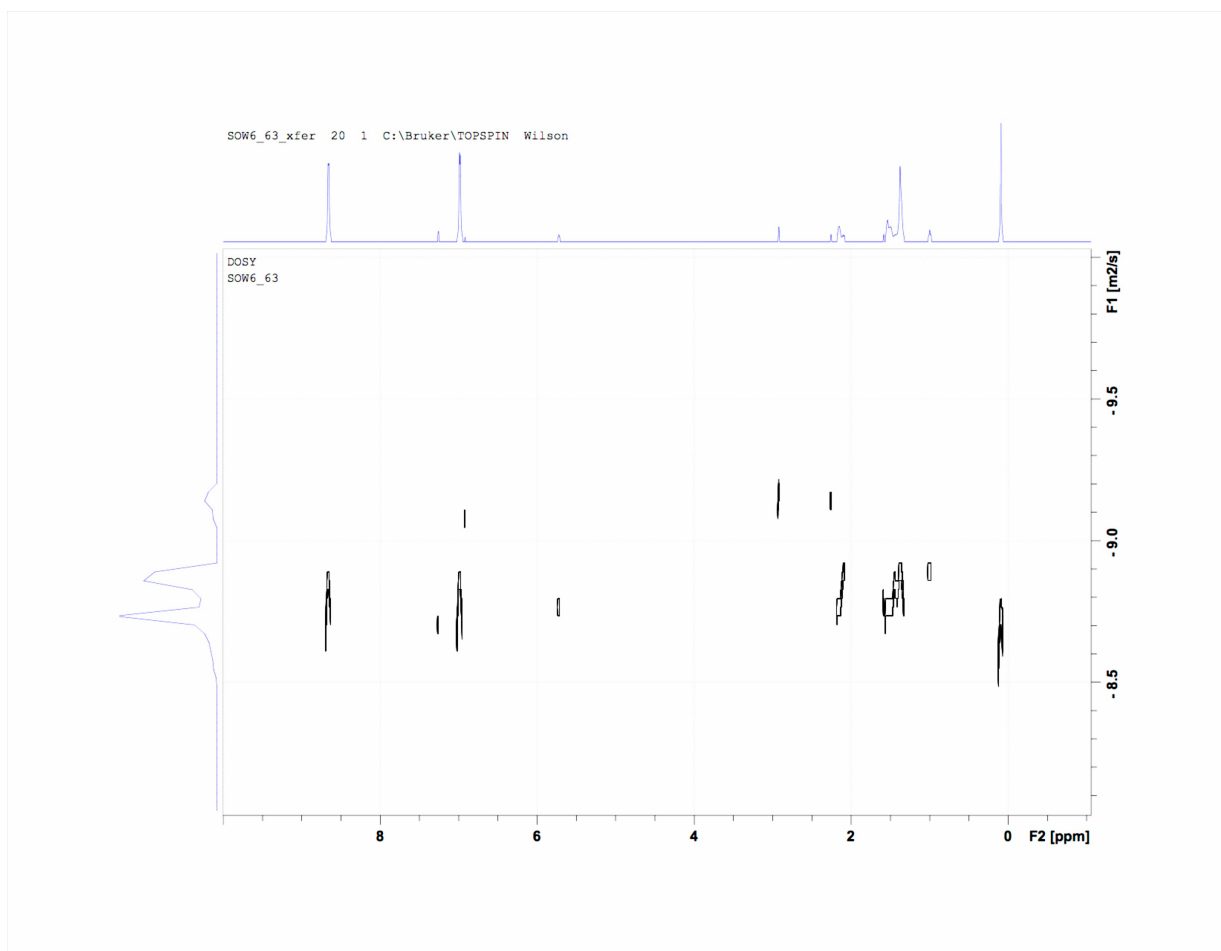

**Figure S14.**  $^1\text{H}$  DOSY spectrum of  $\text{Mes}_2\text{Si}(\text{OH})_2$  (10 mM) and 4,4-bipyridine (500 mM) in  $\text{C}_6\text{D}_6$  with internal standards.

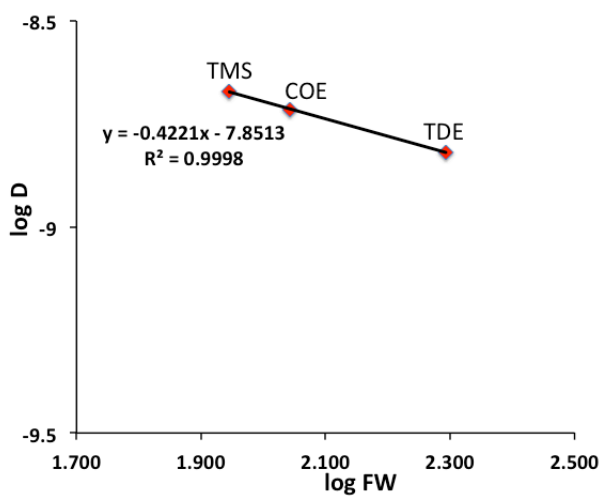

**Figure S15.** Standard curve for  $^1\text{H}$  DOSY experiment with  $\text{Mes}_2\text{Si}(\text{OH})_2$  (10 mM) and 4,4-bipyridine (500 mM) in  $\text{C}_6\text{D}_6$  with internal standards (TMS, COE, TDE).

**Scheme S5:** Proposed Equilibrium for  $\text{Mes}_2\text{Si}(\text{OH})_2$  at 10mM with 4,4'-Bipyridine

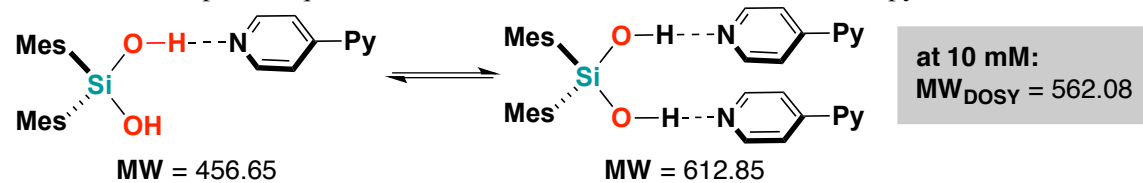

**Table S5.** Diffusion constants and estimated formula weight of species observed in  $^1\text{H}$  NMR spectra with 10 mM of  $\text{Mes}_2\text{Si}(\text{OH})_2$  and 50 equivalents of 4,4'-bipyridine correlate to a species in equilibrium between a 1:1 complex and a 1:2 silanediol/bipyridine complex.

| Molecule                             | D ( $\text{m}^2/\text{s}$ ) | log D  | FW (g/mol) | log FW |
|--------------------------------------|-----------------------------|--------|------------|--------|
| COE                                  | 1.93E-09                    | -8.714 | 110.20     | 2.042  |
| TDE                                  | 1.52E-09                    | -8.819 | 196.37     | 2.293  |
| TMS                                  | 2.13E-09                    | -8.672 | 88.22      | 1.946  |
| $\text{Mes}_2\text{Si}(\text{OH})_2$ | 9.73E-10                    | -9.012 | 562.08     | 2.750  |

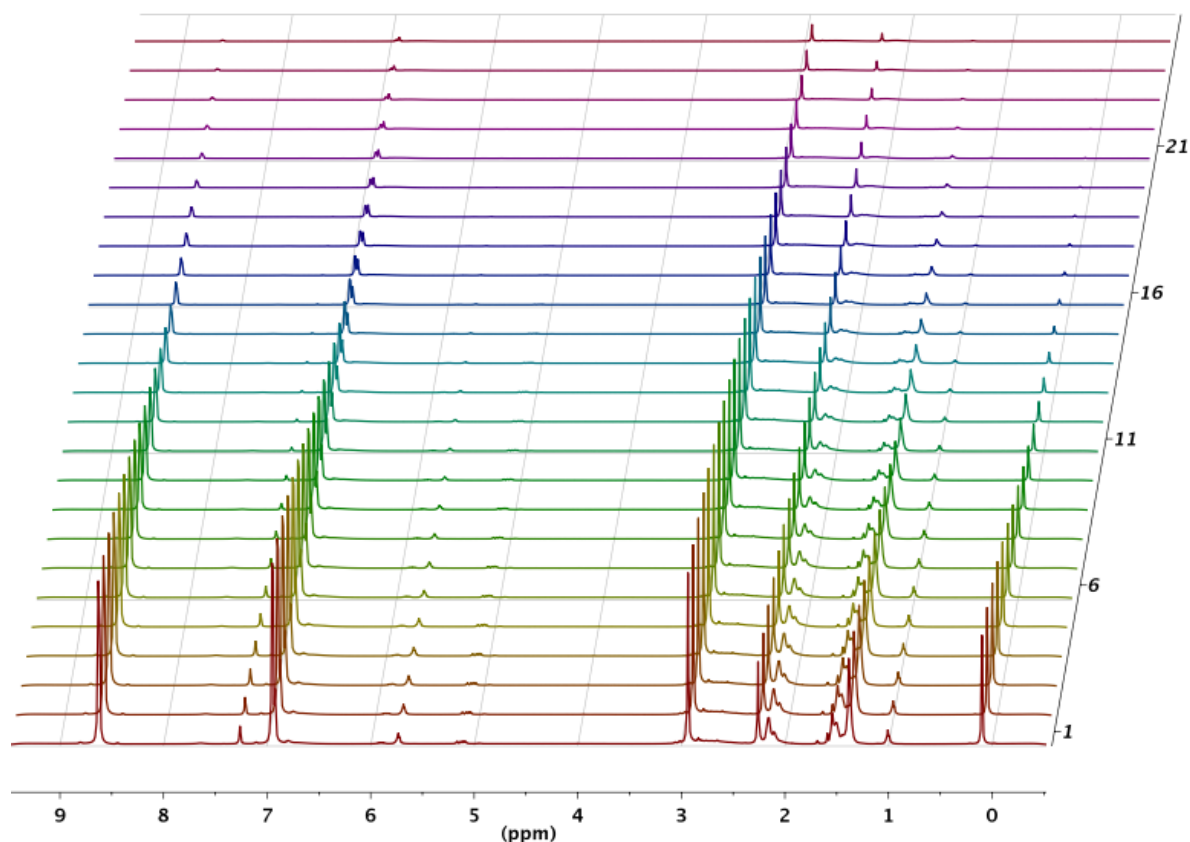

**Figure S16.**  $^1\text{H}$  DOSY experiment with  $\text{Mes}_2\text{Si}(\text{OH})_2$  (100 mM) and 4,4'-bipyridine (500 mM) in  $\text{C}_6\text{D}_6$  with internal standards (TMS, COE, TDE).



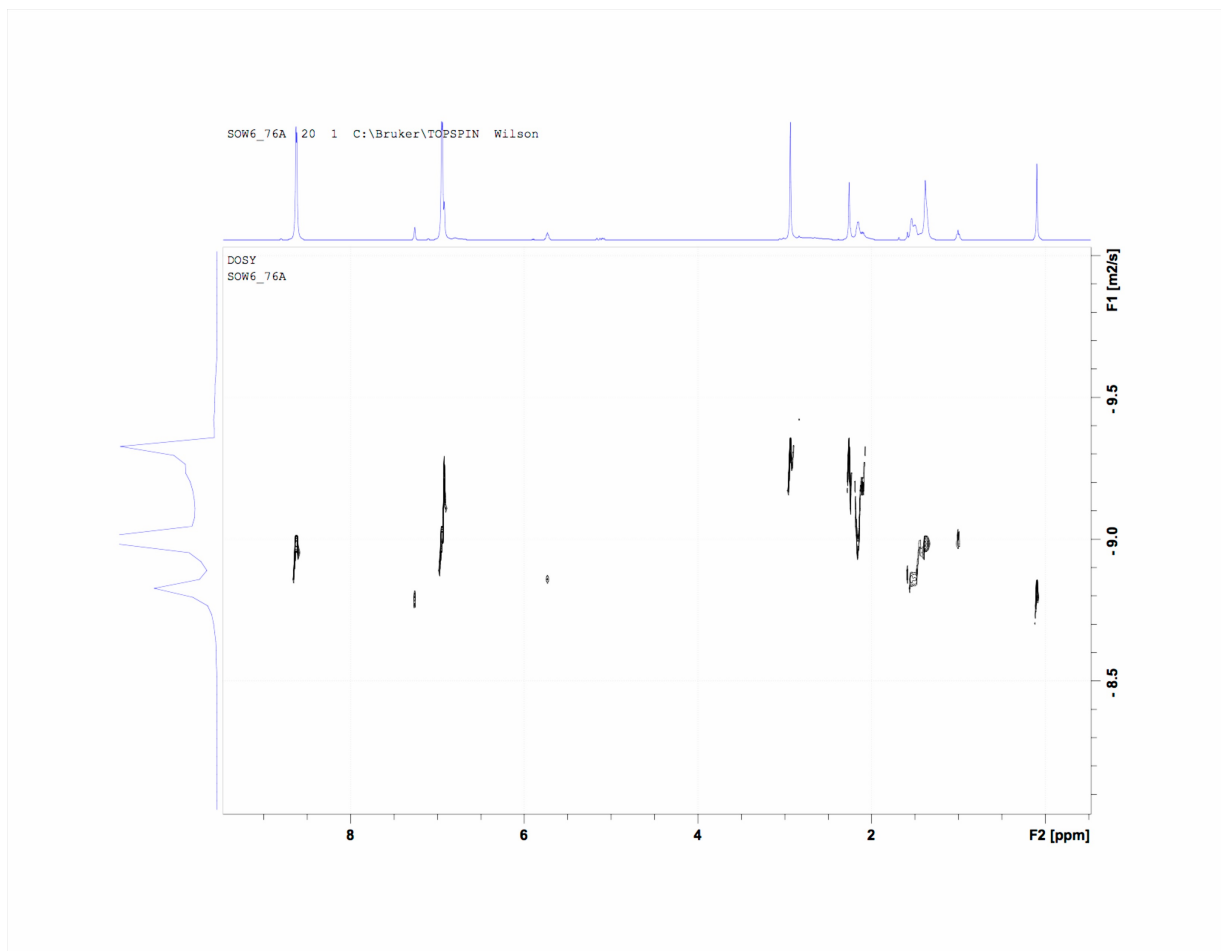

**Figure S17.**  $^1\text{H}$  DOSY spectrum of  $\text{Mes}_2\text{Si}(\text{OH})_2$  (100 mM) and 4,4'-bipyridine (500 mM) in  $\text{C}_6\text{D}_6$  with internal standards.

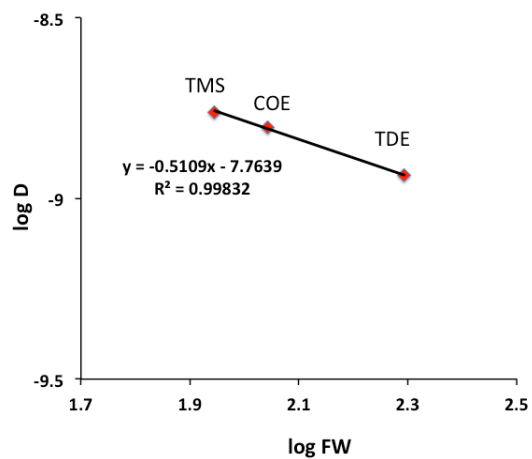

**Figure S18.** Standard curve for  $^1\text{H}$  DOSY experiment with  $\text{Mes}_2\text{Si}(\text{OH})_2$  (100 mM) and 4,4'-bipyridine (500 mM) in  $\text{C}_6\text{D}_6$  with internal standards (TMS, COE, TDE).

**Scheme S6:** Proposed Equilibrium for  $\text{Mes}_2\text{Si}(\text{OH})_2$  at 100mM with 4,4'-Bipyridine

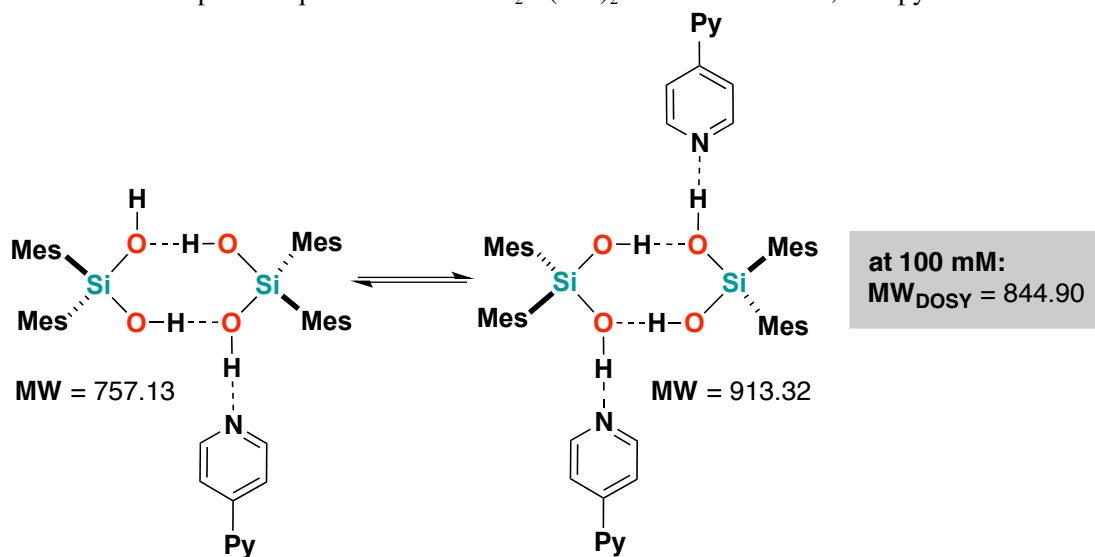

**Table S6.** Diffusion constants and estimated formula weight of  $\text{Mes}_2\text{Si}(\text{OH})_2$  species observed in  $^1\text{H}$  NMR spectra (100 mM  $\text{Mes}_2\text{Si}(\text{OH})_2$  and 500 mM 4,4'-bipyridine) correlate to a higher order hydrogen-bonded species in equilibrium.

| Molecule                             | D (m <sup>2</sup> /s) | log D  | FW (g/mol) | log FW |
|--------------------------------------|-----------------------|--------|------------|--------|
| COE                                  | 1.57E-09              | -8.803 | 110.20     | 2.042  |
| TDE                                  | 1.16E-09              | -8.937 | 196.37     | 2.293  |
| TMS                                  | 1.73E-09              | -8.761 | 88.22      | 1.946  |
| $\text{Mes}_2\text{Si}(\text{OH})_2$ | 5.51E-10              | -9.259 | 844.90     | 2.927  |

### III. NMR Binding Studies

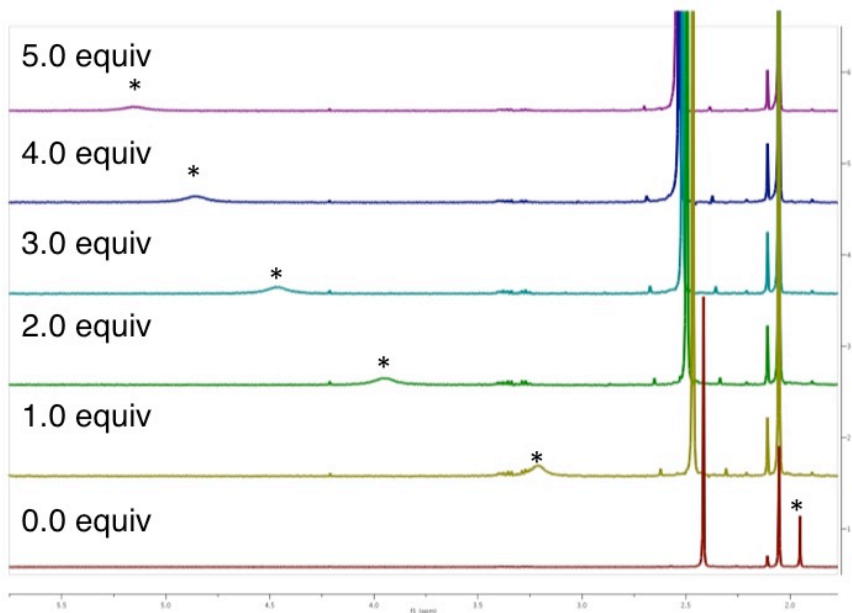

**Figure S19.** Spectra for Mes<sub>2</sub>Si(OH)<sub>2</sub> as a 10 mM solution in C<sub>6</sub>D<sub>6</sub> with 0-5 equivalents of 7-azaindole. A shift of 3.21 ppm is observed for the SiOH hydroxy protons (indicated with \*) when 5.0 equivalents of 7-azaindole are added.

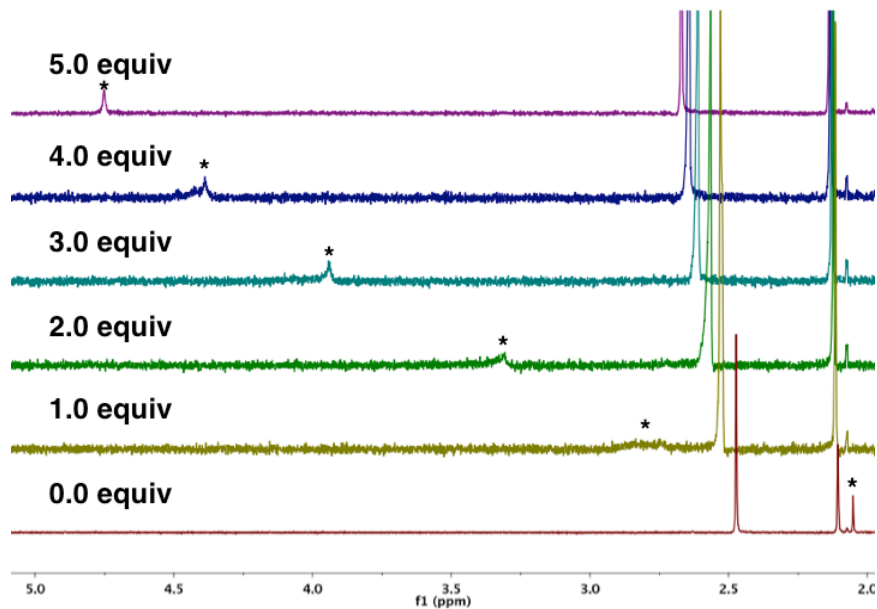

**Figure S20.** Spectra for Mes<sub>2</sub>Si(OH)<sub>2</sub> as a 10 mM solution in C<sub>6</sub>D<sub>6</sub> with 0-5 equivalents of 4,4'-bipyridine. A shift of 2.70 ppm is observed for the SiOH hydroxy protons (indicated with \*) when 5.0 equivalents of 4,4'-bipyridine are added.

### III. Crystallography Data

**Crystal Growth, Structure Collection and Determination.** Crystals were grown from slow evaporation of dimesitylsilanediol with one equivalent of Lewis base in the following solutions: dichloromethane for 4,4'-bipyridine, 1:1 benzene/dichloromethane for phenazine, benzene for 1,4-dimethoxybenzene, and 6:1 benzene/dichloromethane for 7-azaindole. Suitable crystals were mounted on glass fibers with silicone grease and placed in the cold N<sub>2</sub> stream of a Bruker SMART Apex II diffractometer with graphite-monochromated Mo K $\alpha$  radiation ( $\lambda = 0.71073 \text{ \AA}$ ) at 90(2) K.<sup>5</sup> Reflections were integrated and corrected for Lorentz and polarization effects, and absorption was corrected by using Blessing's method<sup>6</sup> with the program SADABS.<sup>7</sup> Structures were solved by direct methods and refined using all data (based on  $F^2$ ) and the software SHELXTL 6.1.<sup>8,9,10</sup> All non-hydrogen atoms were refined anisotropically. In general, as many hydrogen atoms were located on a difference map as possible and then the missing hydrogen atoms were added geometrically. The position and thermal parameters of hydrogen atoms were allowed to refine freely. Full crystallographic data for all crystals can be obtained free of charge from the Cambridge Crystallographic Data Centre via [www.ccdc.cam.ac.uk/data\\_request/cif](http://www.ccdc.cam.ac.uk/data_request/cif). For each crystal, a CCDC number and a shortened description of crystal data and structure refinement are provided below.

#### A. Dimesitylsilanediol with 4,4'-Bipyridine

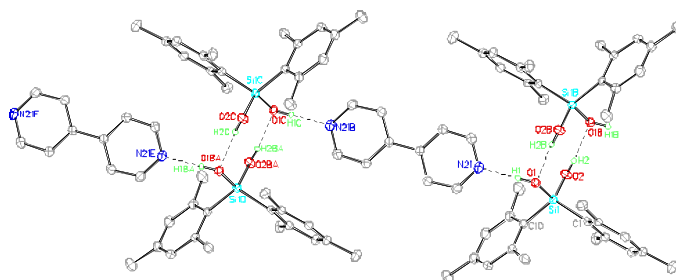

**Figure S21.** Asymmetric unit repeated multiple times to show linking between two cyclic dimers by 4,4'-bipyridine. Dichloromethane molecules, which are not involved in hydrogen bonding, are omitted for charity. The thermal displacement plot shows 50% probability displacement ellipsoids for non-hydrogens. Selected hydrogens are omitted for clarity. CCDC 958825.

<sup>5</sup> Bruker (2002). SMART (Version 5.054) and SAINT (Version 7.23a). Bruker AXS Inc., Madison, Wisconsin, USA.

<sup>6</sup> Blessing, R. H. *Acta Cryst.* **1995**. A51, 33.

<sup>7</sup> Sheldrick, G.M., *SADABS*, Version 2.10; Universitat Gottingen: Gottingen, Germany, 2003.

<sup>8</sup> Sheldrick, G. M. *Acta Cryst.* **2008**. A64, 112.

<sup>9</sup> Sheldrick, G. M., **1997**. *SHELXS97* and *SHELXL97*. Universitat Gottingen: Gottingen, Germany.

<sup>10</sup> Sheldrick, G.M., **2002**. *SHELXTL 6.1*. Bruker AXS Inc., Madison, Wisconsin, USA.

**Table S7.** Crystal data and structure refinement for dimesitylsilanediol with 4,4'-bipyridine solvate.

|                                      |                                                                                  |                               |
|--------------------------------------|----------------------------------------------------------------------------------|-------------------------------|
| Identification code                  | NT110                                                                            |                               |
| Empirical formula                    | C <sub>24</sub> H <sub>30</sub> Cl <sub>2</sub> N <sub>2</sub> O <sub>2</sub> Si |                               |
| Formula weight                       | 463.48                                                                           |                               |
| Temperature                          | 90(2) K                                                                          |                               |
| Wavelength                           | 0.71073 Å                                                                        |                               |
| Crystal system                       | Triclinic                                                                        |                               |
| Space group                          | P -1                                                                             |                               |
| Unit cell dimensions                 | a = 8.4628(15) Å                                                                 | $\alpha = 99.002(18)^\circ$ . |
|                                      | b = 12.198(3) Å                                                                  | $\beta = 98.19(2)^\circ$ .    |
|                                      | c = 12.589(2) Å                                                                  | $\gamma = 108.44(2)^\circ$ .  |
| Volume                               | 1191.9(4) Å <sup>3</sup>                                                         |                               |
| Z                                    | 2                                                                                |                               |
| Density (calculated)                 | 1.291 Mg/m <sup>3</sup>                                                          |                               |
| Absorption coefficient               | 0.343 mm <sup>-1</sup>                                                           |                               |
| F(000)                               | 490                                                                              |                               |
| Crystal size                         | 0.59 x 0.44 x 0.37 mm <sup>3</sup>                                               |                               |
| Crystal color and habit              | colorless block                                                                  |                               |
| Diffractometer                       | Bruker SMART 1000                                                                |                               |
| Theta range for data collection      | 3.17 to 27.57°.                                                                  |                               |
| Index ranges                         | -10<=h<=10, -15<=k<=13, -16<=l<=15                                               |                               |
| Reflections collected                | 8841                                                                             |                               |
| Independent reflections              | 5204 [R(int) = 0.0141]                                                           |                               |
| Observed reflections (I > 2sigma(I)) | 4543                                                                             |                               |
| Completeness to theta = 27.57°       | 94.8 %                                                                           |                               |
| Absorption correction                | Semi-empirical from equivalents                                                  |                               |
| Max. and min. transmission           | 0.8832 and 0.8237                                                                |                               |
| Solution method                      | SHELXS-97 (Sheldrick, 2008)                                                      |                               |
| Refinement method                    | SHELXL-97 (Sheldrick, 2008)                                                      |                               |
| Data / restraints / parameters       | 5204 / 0 / 391                                                                   |                               |
| Goodness-of-fit on F <sup>2</sup>    | 1.046                                                                            |                               |
| Final R indices [I>2sigma(I)]        | R1 = 0.0333, wR2 = 0.0895                                                        |                               |
| R indices (all data)                 | R1 = 0.0394, wR2 = 0.0937                                                        |                               |
| Largest diff. peak and hole          | 0.399 and -0.208 e.Å <sup>-3</sup>                                               |                               |

**Table S8.** Hydrogen bonds for Mes<sub>2</sub>Si(OH)<sub>2</sub>•4,4'-bipyridine [Å and °].

| D-H...A            | d(D-H)  | d(H...A) | d(D...A)   | <(DHA) |
|--------------------|---------|----------|------------|--------|
| O(2)-H(2)...O(1)#2 | 0.75(2) | 2.00(2)  | 2.7476(16) | 174(2) |
| O(1)-H(1)...N(21)  | 0.83(2) | 1.88(2)  | 2.7138(18) | 178(2) |

Symmetry transformations used to generate equivalent atoms: #1 -x+2,-y+1,-z+2 #2 -x+1,-y+1,-z+1

## B. Dimesitylsilanediol with Phenazine

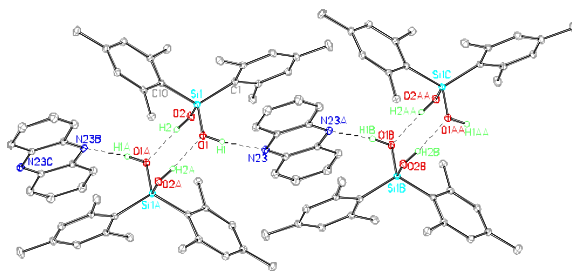

**Figure S22.** Asymmetric unit repeated multiple times to show linking between two cyclic dimers by phenazine. The thermal displacement plot shows 30% probability displacement ellipsoids for non-hydrogens. Selected hydrogens are omitted for clarity. CCDC 958790.

**Table S9.** Crystal data and structure refinement for dimesitylsilanediol with phenazine solvate.

|                                   |                                                                  |                                |
|-----------------------------------|------------------------------------------------------------------|--------------------------------|
| Identification code               | NT114                                                            |                                |
| Empirical formula                 | C <sub>24</sub> H <sub>28</sub> N <sub>2</sub> O <sub>2</sub> Si |                                |
| Formula weight                    | 390.56                                                           |                                |
| Temperature                       | 90(2) K                                                          |                                |
| Wavelength                        | 0.71073 Å                                                        |                                |
| Crystal system                    | Monoclinic                                                       |                                |
| Space group                       | P 2 <sub>1</sub> /n                                              |                                |
| Unit cell dimensions              | a = 11.7044(6) Å                                                 | $\alpha = 90^\circ$ .          |
|                                   | b = 11.1778(6) Å                                                 | $\beta = 107.2130(10)^\circ$ . |
|                                   | c = 16.8654(9) Å                                                 | $\gamma = 90^\circ$ .          |
| Volume                            | 2107.66(19) Å <sup>3</sup>                                       |                                |
| Z                                 | 4                                                                |                                |
| Density (calculated)              | 1.231 Mg/m <sup>3</sup>                                          |                                |
| Absorption coefficient            | 0.131 mm <sup>-1</sup>                                           |                                |
| F(000)                            | 836                                                              |                                |
| Crystal size                      | 0.51 x 0.42 x 0.36 mm <sup>3</sup>                               |                                |
| Crystal color and habit           | yellow block                                                     |                                |
| Diffractometer                    | Bruker SMART APEXII CCD                                          |                                |
| Theta range for data collection   | 2.58 to 27.49°.                                                  |                                |
| Index ranges                      | -15 ≤ h ≤ 15, -14 ≤ k ≤ 14, -21 ≤ l ≤ 21                         |                                |
| Reflections collected             | 23090                                                            |                                |
| Independent reflections           | 4821 [R(int) = 0.0156]                                           |                                |
| Observed reflections (I > 2σ(I))  | 4515                                                             |                                |
| Completeness to theta = 27.49°    | 99.9 %                                                           |                                |
| Absorption correction             | Semi-empirical from equivalents                                  |                                |
| Max. and min. transmission        | 0.9545 and 0.9364                                                |                                |
| Solution method                   | SHELXS-97 (Sheldrick, 2008)                                      |                                |
| Refinement method                 | SHELXL-97 (Sheldrick, 2008)                                      |                                |
| Data / restraints / parameters    | 4821 / 0 / 365                                                   |                                |
| Goodness-of-fit on F <sup>2</sup> | 1.050                                                            |                                |
| Final R indices [I > 2σ(I)]       | R1 = 0.0319, wR2 = 0.0873                                        |                                |
| R indices (all data)              | R1 = 0.0337, wR2 = 0.0890                                        |                                |
| Largest diff. peak and hole       | 0.404 and -0.289 e.Å <sup>-3</sup>                               |                                |

**Table S10.** Hydrogen bonds for Mes<sub>2</sub>Si(OH)<sub>2</sub>• phenazine [Å and °].

| D-H...A            | d(D-H)    | d(H...A)  | d(D...A)   | <(DHA)    |
|--------------------|-----------|-----------|------------|-----------|
| O(2)-H(2)...O(1)#2 | 0.828(19) | 1.920(19) | 2.7446(11) | 173.7(18) |
| O(1)-H(1)...N(23)  | 0.855(19) | 1.946(19) | 2.7932(12) | 170.8(16) |

Symmetry transformations used to generate equivalent atoms: #1 -x+1,-y+2,-z+2 #2 -x+1,-y+1,-z+2

### C. Dimesitylsilanediol with 1,4-Dimethoxybenzene

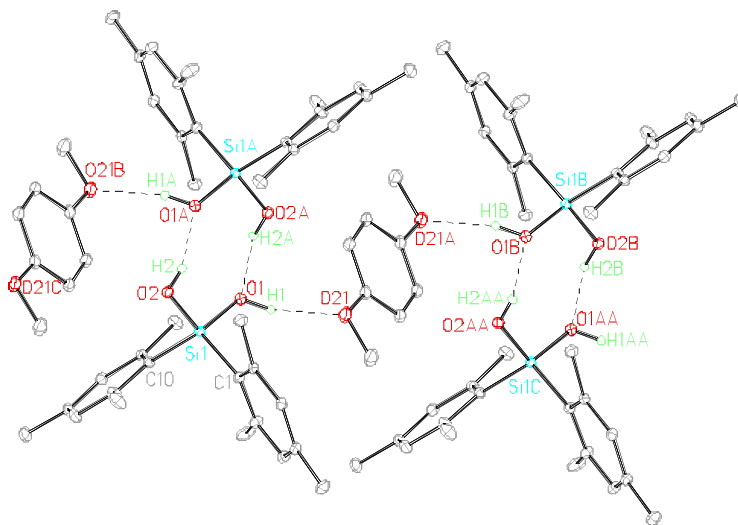

**Figure S23.** Asymmetric unit repeated multiple times to show linking between two cyclic dimers by 1,4-dimethoxybenzene. The thermal displacement plot shows 30% probability displacement ellipsoids for non-hydrogens. Selected hydrogens are omitted for clarity. CCDC 958824.

**Table S11.** Crystal data and structure refinement for dimesitylsilanediol with 1,4-dimethoxybenzene.

|                                           |                                                   |                          |
|-------------------------------------------|---------------------------------------------------|--------------------------|
| Identification code                       | NT116                                             |                          |
| Empirical formula                         | C <sub>22</sub> H <sub>29</sub> O <sub>3</sub> Si |                          |
| Formula weight                            | 369.54                                            |                          |
| Temperature                               | 90(2) K                                           |                          |
| Wavelength                                | 0.71073 Å                                         |                          |
| Crystal system                            | Triclinic                                         |                          |
| Space group                               | P -1                                              |                          |
| Unit cell dimensions                      | a = 8.4092(2) Å                                   | $\alpha = 99.15^\circ$ . |
|                                           | b = 9.0220(2) Å                                   | $\beta = 97.10^\circ$ .  |
|                                           | c = 13.4486(3) Å                                  | $\gamma = 93.79^\circ$ . |
| Volume                                    | 995.76(4) Å <sup>3</sup>                          |                          |
| Z                                         | 2                                                 |                          |
| Density (calculated)                      | 1.233 Mg/m <sup>3</sup>                           |                          |
| Absorption coefficient                    | 0.136 mm <sup>-1</sup>                            |                          |
| F(000)                                    | 398                                               |                          |
| Crystal size                              | 0.38 x 0.38 x 0.36 mm <sup>3</sup>                |                          |
| Crystal color and habit                   | colorless block                                   |                          |
| Diffractometer                            | Bruker SMART APEXII CCD                           |                          |
| Theta range for data collection           | 2.45 to 33.27°.                                   |                          |
| Index ranges                              | -12<=h<=12, -13<=k<=13, -20<=l<=20                |                          |
| Reflections collected                     | 15470                                             |                          |
| <b>Table S11 (continued)</b>              |                                                   |                          |
| Independent reflections                   | 7069 [R(int) = 0.0157]                            |                          |
| Observed reflections (I > 2 $\sigma$ (I)) | 6024                                              |                          |
| Completeness to theta = 33.27°            | 95.4 %                                            |                          |
| Absorption correction                     | Semi-empirical from equivalents                   |                          |
| Max. and min. transmission                | 0.9530 and 0.9504                                 |                          |
| Solution method                           | SHELXS-97 (Sheldrick, 2008)                       |                          |
| Refinement method                         | SHELXL-97 (Sheldrick, 2008)                       |                          |
| Data / restraints / parameters            | 7069 / 0 / 351                                    |                          |
| Goodness-of-fit on F <sup>2</sup>         | 1.057                                             |                          |
| Final R indices [I>2 $\sigma$ (I)]        | R1 = 0.0360, wR2 = 0.0978                         |                          |
| R indices (all data)                      | R1 = 0.0436, wR2 = 0.1032                         |                          |
| Largest diff. peak and hole               | 0.457 and -0.231 e.Å <sup>-3</sup>                |                          |

**Table S12.** Hydrogen bonds for Mes<sub>2</sub>Si(OH)<sub>2</sub>•1,4-dimethoxybenzene [Å and °].

| D-H...A            | d(D-H)    | d(H...A)  | d(D...A)  | <(DHA)    |
|--------------------|-----------|-----------|-----------|-----------|
| O(2)-H(2)...O(1)#2 | 0.874(18) | 1.961(18) | 2.8087(9) | 163.1(17) |
| O(1)-H(1)...O(21)  | 0.857(17) | 2.004(17) | 2.8399(9) | 164.9(15) |

Symmetry transformations used to generate equivalent atoms: #1 -x+1,-y+2,-z #2 -x,-y+1,-z



## D. Dimesitylsilanediol with 7-Azaindole

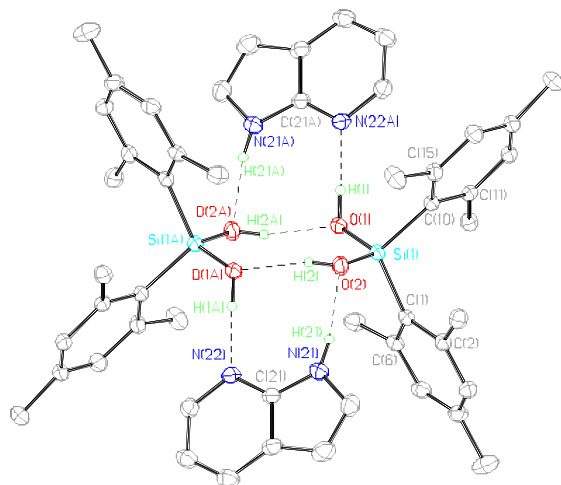

**Figure S24.** Asymmetric unit repeated once to show cyclic dimer cluster supramolecular motif and intermolecular hydrogen bonding with 7-azaindole. The thermal displacement plot shows 50% probability displacement ellipsoids for non-hydrogens. Selected hydrogens are omitted for clarity. CCDC 958784.

**Table S13.** Crystal data and structure refinement for dimesitylsilanediol with 7-azaindole.

|                                   |                                                                  |                               |
|-----------------------------------|------------------------------------------------------------------|-------------------------------|
| Identification code               | NT67                                                             |                               |
| Empirical formula                 | C <sub>25</sub> H <sub>30</sub> N <sub>2</sub> O <sub>2</sub> Si |                               |
| Formula weight                    | 418.60                                                           |                               |
| Temperature                       | 90(2) K                                                          |                               |
| Wavelength                        | 0.71073 Å                                                        |                               |
| Crystal system                    | Monoclinic                                                       |                               |
| Space group                       | P 21/c                                                           |                               |
| Unit cell dimensions              | a = 11.9457(10) Å                                                | $\alpha = 90^\circ$ .         |
|                                   | b = 11.0271(10) Å                                                | $\beta = 97.9210(10)^\circ$ . |
|                                   | c = 17.2592(15) Å                                                | $\gamma = 90^\circ$ .         |
|                                   | 2251.8(3) Å <sup>3</sup>                                         |                               |
| <b>Table S13 (continued)</b>      |                                                                  |                               |
| Volume                            | 2251.8(3) Å <sup>3</sup>                                         |                               |
| Z                                 | 4                                                                |                               |
| Density (calculated)              | 1.235 Mg/m <sup>3</sup>                                          |                               |
| Absorption coefficient            | 0.128 mm <sup>-1</sup>                                           |                               |
| F(000)                            | 896                                                              |                               |
| Crystal size                      | 0.47 x 0.26 x 0.22 mm <sup>3</sup>                               |                               |
| Crystal color and habit           | colorless block                                                  |                               |
| Diffractometer                    | Bruker SMART 1000                                                |                               |
| Theta range for data collection   | 1.72 to 27.51°.                                                  |                               |
| Index ranges                      | -15 ≤ h ≤ 15, -14 ≤ k ≤ 14, -22 ≤ l ≤ 22                         |                               |
| Reflections collected             | 23897                                                            |                               |
| Independent reflections           | 5185 [R(int) = 0.0299]                                           |                               |
| Observed reflections (I > 2σ(I))  | 4384                                                             |                               |
| Completeness to theta = 27.51°    | 99.9 %                                                           |                               |
| Absorption correction             | Semi-empirical from equivalents                                  |                               |
| Max. and min. transmission        | 0.9729 and 0.9424                                                |                               |
| Solution method                   | SHELXS-97 (Sheldrick, 2008)                                      |                               |
| Refinement method                 | SHELXL-97 (Sheldrick, 2008)                                      |                               |
| Data / restraints / parameters    | 5185 / 0 / 391                                                   |                               |
| Goodness-of-fit on F <sup>2</sup> | 1.034                                                            |                               |
| Final R indices [I > 2σ(I)]       | R1 = 0.0397, wR2 = 0.1046                                        |                               |
| R indices (all data)              | R1 = 0.0484, wR2 = 0.1121                                        |                               |
| Largest diff. peak and hole       | 0.601 and -0.300 e.Å <sup>-3</sup>                               |                               |

**Table S14.** Hydrogen bonds for Mes<sub>2</sub>Si(OH)<sub>2</sub>•7-azaindole [Å and °].

| D-H...A             | d(D-H)  | d(H...A) | d(D...A)   | <(DHA) |
|---------------------|---------|----------|------------|--------|
| O(1)-H(1)...N(22)#1 | 0.90(3) | 1.79(3)  | 2.6769(15) | 171(3) |
| O(2)-H(2)...O(1)#1  | 0.82(2) | 1.91(2)  | 2.7049(14) | 166(2) |
| N(21)-H(21)...O(2)  | 0.90(2) | 2.02(2)  | 2.9161(16) | 172(2) |

Symmetry transformations used to generate equivalent atoms: #1 -x+2,-y+1,-z
